# Supplementary material for: Effects of Antimony Stress on Growth and Physiology of 10 Genotypes of Catalpa bungei
Source: MDPI journal article supplement (doi:10.3390/f12081036), 2021-08-04
Supplement: s1 [file s1]

Supplementary Materials

**Table S1.** Effects of Sb concentration on growth of *Catalpa bungei*.

| Genotypes | Sb Treatment (mg/kg) | Height Increment (cm) | Ground Diameter Increment (cm) |
|-----------|----------------------|-----------------------|--------------------------------|
| 8402      | 0                    | 9.22±2.03             | 0.18±0.06ab                    |
|           | 600                  | 9.48±2.20             | 0.23±0.13b                     |
|           | 1200                 | 8.12±1.11             | 0.13±0.10ab                    |
|           | 2000                 | 7.93±1.28             | 0.11±0.05a                     |
| 20-01     | 0                    | 12.67±4.38a           | 0.13±0.05a                     |
|           | 600                  | 17.08±3.54b           | 0.37±0.24b                     |
|           | 1200                 | 11.62±3.64a           | 0.15±0.09a                     |
|           | 2000                 | 10.92±1.49a           | 0.13±0.04a                     |
| 5-8       | 0                    | 12.90±3.11a           | 0.18±0.04                      |
|           | 600                  | 15.88±2.31b           | 0.20±0.05                      |
|           | 1200                 | 12.68±2.52a           | 0.20±0.10                      |
|           | 2000                 | 11.32±2.78a           | 0.15±0.08                      |
| 63        | 0                    | 12.45±4.72            | 0.21±0.09abc                   |
|           | 600                  | 12.97±1.71            | 0.23±0.04abc                   |
|           | 1200                 | 11.00±5.31            | 0.25±0.11b                     |
|           | 2000                 | 8.53±2.67             | 0.14±0.05c                     |
| 5-2       | 0                    | 15.48±1.78a           | 0.25±0.10                      |
|           | 600                  | 12.85±1.93b           | 0.20±0.08                      |
|           | 1200                 | 12.15±1.46b           | 0.22±0.04                      |
|           | 2000                 | 9.35±2.33c            | 0.22±0.08                      |
| 0         | 0                    | 9.70±2.17a            | 0.28±0.06                      |
|           | 600                  | 15.21±2.36b           | 0.21±0.09                      |
|           | 1200                 | 11.05±2.51a           | 0.19±0.12                      |
|           | 2000                 | 9.48±2.19a            | 0.18±0.12                      |
| 1         | 0                    | 11.33±3.84            | 0.22±0.04a                     |
|           | 600                  | 12.30±5.34            | 0.21±0.07a                     |
|           | 1200                 | 10.13±1.63            | 0.20±0.05a                     |
|           | 2000                 | 12.00±3.02            | 0.11±0.07b                     |
| 2-8       | 0                    | 13.15±0.88a           | 0.22±0.05                      |
|           | 600                  | 13.35±4.29a           | 0.20±0.09                      |
|           | 1200                 | 10.30±3.20ab          | 0.20±0.08                      |
|           | 2000                 | 9.80±1.06b            | 0.16±0.08                      |
| 1-1       | 0                    | 12.57±5.21a           | 0.20±0.07abc                   |
|           | 600                  | 14.30±3.89a           | 0.21±0.05b                     |
|           | 1200                 | 5.75±0.54b            | 0.15±0.04abc                   |
|           | 2000                 | 5.00±0.33b            | 0.14±0.03c                     |
| 72        | 0                    | 9.77±6.51a            | 0.23±0.17                      |
|           | 600                  | 9.62±5.15a            | 0.20±0.08                      |
|           | 1200                 | 17.12±3.85b           | 0.23±0.14                      |
|           | 2000                 | 10.48±1.11a           | 0.18±0.03                      |

**Table S2.** Effects of Sb concentration on the biomass of *Catalpa bungei*.

| Genotypes | Sb Treatment (mg/kg) | Biomass of Different Genotypes (g) |                  |
|-----------|----------------------|------------------------------------|------------------|
|           |                      | Roots                              | Aboveground Part |
| 8402      | 0                    | 8.62±0.64                          | 16.08±1.72a      |
|           | 600                  | 9.24±0.38                          | 18.15±0.61a      |
|           | 1200                 | 8.62±0.80                          | 15.82±1.95ab     |
|           | 2000                 | 9.24±1.32                          | 12.86±1.97b      |
| 20-01     | 0                    | 4.16±0.14a                         | 18.21±1.09a      |
|           | 600                  | 4.74±0.22b                         | 19.48±1.62a      |
|           | 1200                 | 3.70±0.24c                         | 18.18±1.29a      |
|           | 2000                 | 3.32±0.15d                         | 15.20±1.24b      |
| 5-8       | 0                    | 9.01±0.50a                         | 23.69±1.76a      |
|           | 600                  | 11.22±0.35b                        | 34.21±1.37b      |
|           | 1200                 | 10.03±0.45c                        | 18.31±1.72c      |
|           | 2000                 | 7.12±0.22d                         | 15.51±1.84c      |
| 63        | 0                    | 5.86±0.54a                         | 18.99±2.12a      |
|           | 600                  | 7.38±0.17b                         | 16.26±0.72b      |
|           | 1200                 | 6.33±0.21a                         | 15.59±0.72bc     |
|           | 2000                 | 5.09±0.34c                         | 13.48±0.91c      |
| 5-2       | 0                    | 7.99±0.22a                         | 22.46±2.78a      |
|           | 600                  | 7.28±0.13b                         | 19.76±1.90ab     |
|           | 1200                 | 6.62±0.15c                         | 18.61±1.76b      |
|           | 2000                 | 5.44±0.12d                         | 13.37±1.39c      |
| 0         | 0                    | 7.02±0.15a                         | 11.75±1.17a      |
|           | 600                  | 8.45±0.56b                         | 14.28±0.86b      |
|           | 1200                 | 7.35±0.51abc                       | 14.17±0.30b      |
|           | 2000                 | 6.54±0.53c                         | 9.56±0.97c       |
| 1         | 0                    | 8.88±0.95a                         | 18.89±1.00a      |
|           | 600                  | 9.10±0.53a                         | 20.61±1.96a      |
|           | 1200                 | 8.94±0.38a                         | 14.01±0.47b      |
|           | 2000                 | 6.98±0.42b                         | 10.18±0.77c      |
| 2-8       | 0                    | 5.65±0.23a                         | 18.56±1.99a      |
|           | 600                  | 7.95±0.27c                         | 15.48±0.69b      |
|           | 1200                 | 6.13±0.37a                         | 19.23±1.39a      |
|           | 2000                 | 4.70±0.13b                         | 12.58±2.05b      |
| 1-1       | 0                    | 2.20±0.06a                         | 9.83±0.12a       |
|           | 600                  | 5.49±0.17b                         | 14.10±0.68b      |
|           | 1200                 | 1.89±0.21c                         | 4.25±0.24c       |
|           | 2000                 | 1.72±0.14c                         | 3.86±0.10c       |
| 72        | 0                    | 4.27±0.26a                         | 11.52±1.02a      |
|           | 600                  | 5.87±0.05b                         | 13.65±0.96b      |
|           | 1200                 | 5.84±0.22b                         | 10.61±1.40ac     |
|           | 2000                 | 4.82±0.17c                         | 9.28±1.04c       |
